# Supplementary material for: The fine electrochemical performance of porous Cu3P/Cu and the high energy density of Cu3P as anode for Li-ion batteries
Source: Royal Society of Chemistry journal article supplement (doi:10.1039/c4ta03871a), 2014-11-10
Supplement: c4ta03871a1.pdf [file c4ta03871a1.pdf]

## Supplementary information

### The fine electrochemical performance of porous Cu<sub>3</sub>P/Cu and the high energy density of Cu<sub>3</sub>P as anode for Li-ion batteries

Shibing Ni,<sup>a,b\*</sup> Jianjun Ma<sup>a</sup>, Xiaohu Lv<sup>a</sup>, Xuelin Yang,<sup>a,b</sup> \* Lulu Zhang<sup>a,b</sup>

<sup>a</sup> College of Materials and Chemical Engineering, Three Gorges University, 8 Daxue Road, Yichang, Hubei 443002, China.

<sup>b</sup>Hubei Provincial Collaborative Innovation Center for New Energy Microgrid, China Three Gorges University.

E-mail: shibingni07@126.com.

#### Experiments

##### Sample preparation

Cu<sub>3</sub>P electrode was synthesized by a facile high temperature reaction method. Cu foams (100 PPI pore size, 380 g m<sup>-2</sup> surface density, 1.5 mm thick) was purchased from Changsha Lyrun New Material. Red phosphorus (analytical grade) was purchased from Sinopharm Chemical Reagent Corporation. In a typical procedure, 0.5 g red phosphorus was firstly placed in a ceramic boat, Cu foams were then placed on it. Cu foam scraps were use to separate red phosphorus and Cu foam. The ceramic boat was placed in a tube furnace and then heated to 350 °C for 5h in N<sub>2</sub> atmosphere at a heating rate of 3 °C min<sup>-1</sup>. The weight of Cu<sub>3</sub>P on Cu can be calculated according to the reaction  $P + 3Cu \rightarrow Cu_3P$ .  $m_{Cu_3P} = \Delta m \times 221.5/31$ , where  $\Delta m$  is the weight difference of Cu foam before and after reaction.

##### Structure and morphology characterization

The structure and morphology of the resulting products were characterized by X-Ray powder diffraction (Rigaku Ultima IV, Cu K $\alpha$  radiation,  $\lambda=1.5406 \text{ \AA}$ ) and field-

emission scanning electron microscopy (FE-SEM JSM 7500F, JEOL).

### Electrochemical characterization

For fabricating of lithium ion battery, the  $\text{Cu}_3\text{P}/\text{Cu}$  was dried at 120 °C for 24 h in vacuum oven. Coin-type cells (2025) of Li/1 M  $\text{LiPF}_6$  in ethylene carbonate, dimethyl carbonate and diethyl carbonate (EC/DMC/DEC, 1:1:1 v/v/v)/ $\text{Cu}_3\text{P}/\text{Cu}$  discs with diameter of 14 mm were assembled in an argon-filled dry box (MIKROUNA, Super 1220/750,  $\text{H}_2\text{O}$ <1.0 ppm,  $\text{O}_2$ <1.0 ppm). A Celgard 2400 microporous polypropylene was used as the separator membrane. The cells were tested in the voltage region between 0.02 and 3 V with a multichannel battery test system (LAND CT2001A). The Cyclic voltammetry (CV) measurement of the electrodes was carried out on a CHI660C electrochemical workstation at a scan rate of 0.2  $\text{mV s}^{-1}$  between 0 and 3 V.

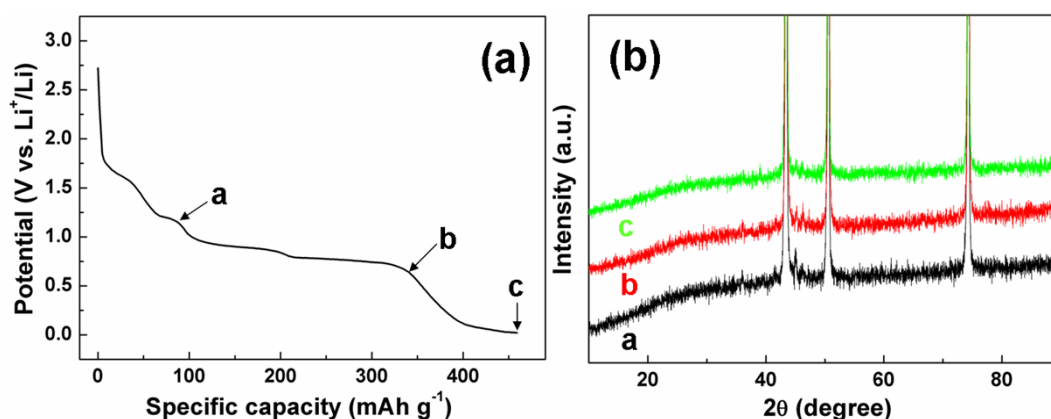

Fig. S1 the initial discharge curve (a) and corresponding XRD patterns of the  $\text{Cu}_3\text{P}/\text{Cu}$  electrode.

Fig. S1 shows the XRD patterns of the  $\text{Cu}_3\text{P}/\text{Cu}$  electrode under different state in the initial discharge process. It is estimated to be about 0.74, 2.83 and 3.79 mol  $\text{Li}^+$  per  $\text{Cu}_3\text{P}$  formula at point a, b and c, respectively. As seen, the diffraction peaks of  $\text{Cu}_3\text{P}$  reduce along with the increasing of discharge degree, and finally disappear when discharging to 0.02 V. The results suggest a phase transition of  $\text{Cu}_3\text{P}$  owing to the formation of  $\text{Li}_x\text{Cu}_{3-x}\text{P}$  and Cu in discharging, accompanied by an amorphization

process [1, 2].

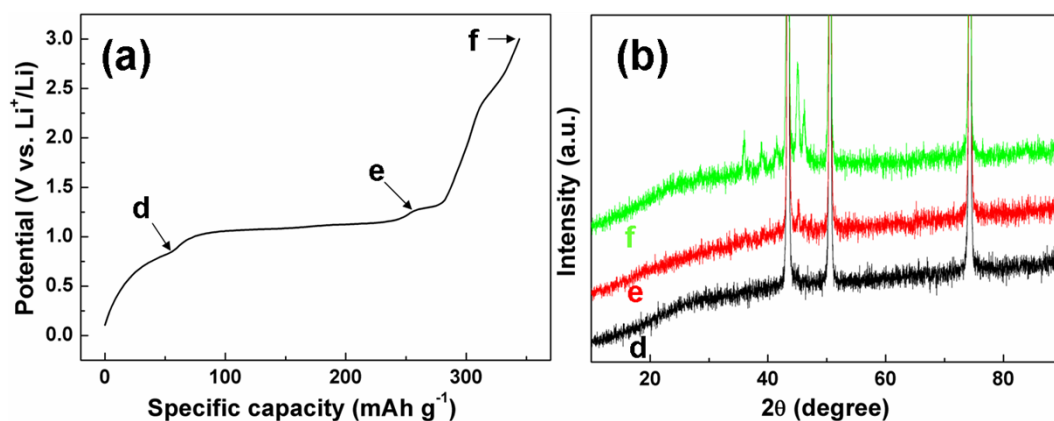

Fig. S2 the initial charge curve (a) and corresponding XRD patterns of the  $\text{Cu}_3\text{P}/\text{Cu}$  electrode.

Fig. S2 shows the XRD patterns of the  $\text{Cu}_3\text{P}/\text{Cu}$  electrode under different state in the initial charge process. As seen, the diffraction peaks of  $\text{Cu}_3\text{P}$  appear when charging to 3.0 V, suggesting the reversible extraction of lithium ions owing to the formation of  $\text{Li}_x\text{Cu}_{3-x}\text{P}$  in charging process, accompanied by a recrystallization process [1, 2].

[1] M.P. Bichat, T. Politova, J.L. Pascal, F. Favier and L. Monconduit, *J. Electrochem. Soc.*, 2004, 151, A2074-A2081.

[2] B. Mauvernay, M.P. Bichat, F. Favier, L. Monconduit, M. Morcrette and M.L. Doublet, *Ionics*, 2005, 11, 36-45.
